# Supplementary material for: Using Paleogenomics to Study the Evolution of Gene Families: Origin and Duplication History of the Relaxin Family Hormones and Their Receptors
Source: PubMed Central journal article supplement (PMC3310001; doi:10.1371/journal.pone.0032923), 2012-03-21
Supplement: pone.0032923.s001.pdf [file pone.0032923.s001.pdf]

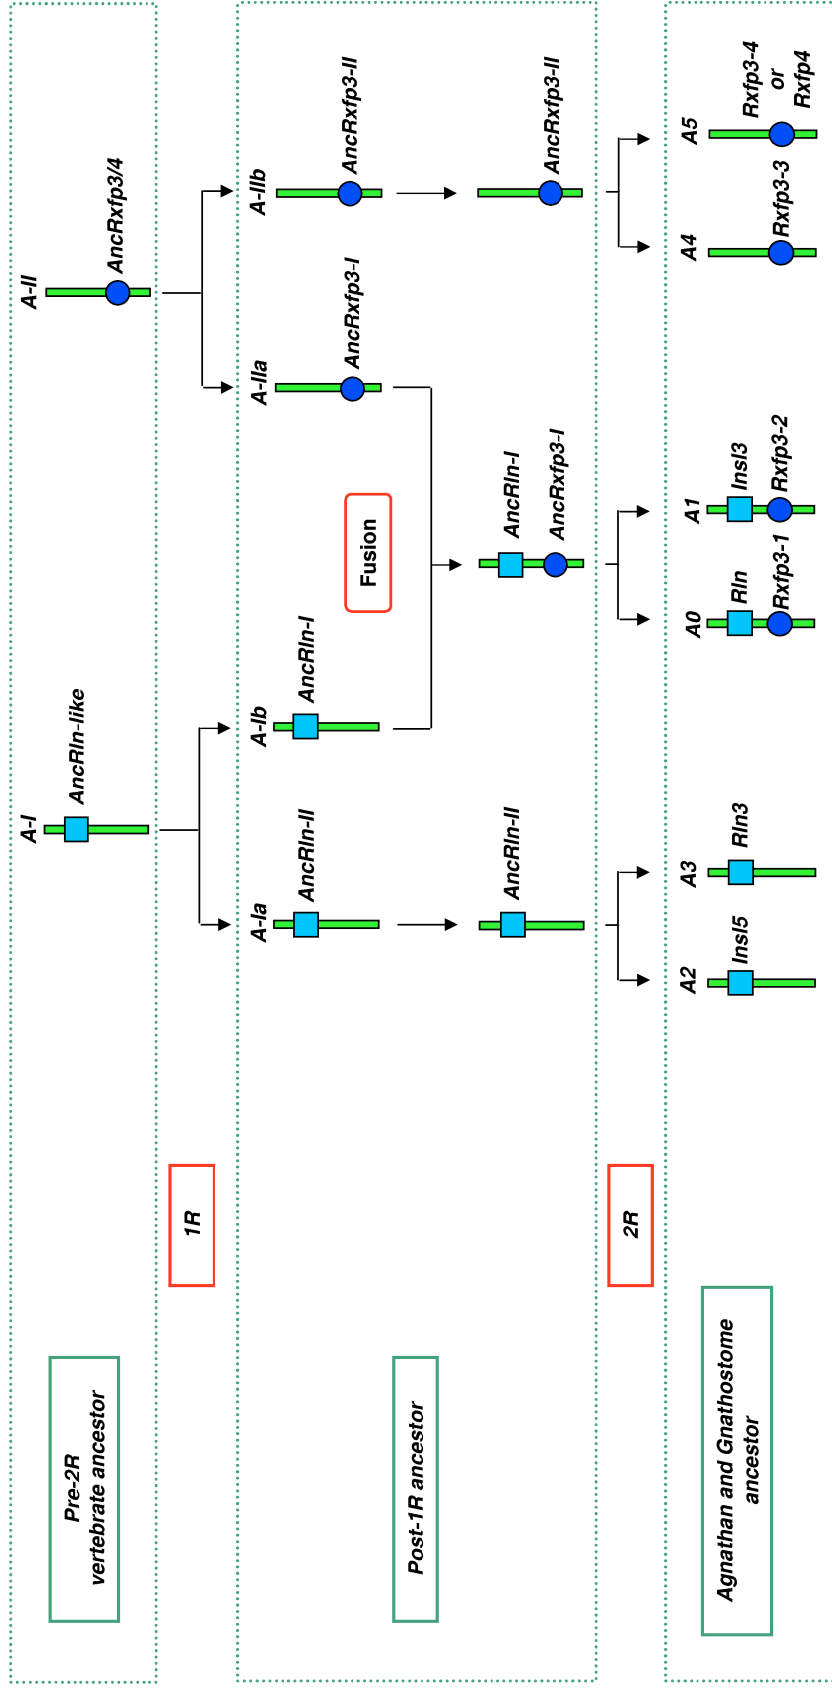

**Figure S1.** The alternative (“fusion”) scenario of duplication and rearrangement history for VAC “A” according to the N-model. While the number and identity of post-2R daughter chromosomes in both scenarios (see Figure 2 in main text for the other scenario) is the same, the introduction of a *fusion* event (red boxed in Figure 2, main text) in this scenario results in two pre-2R chromosomes (*A-I* and *A-II*) each carrying one gene (a ligand gene on one, and a receptor gene on the other). Notice that according to this scenario *AncRln-like* was not syntetically linked to *AncRxfp3/4* in the pre-2R vertebrate ancestor
