# Supplementary material for: Using Paleogenomics to Study the Evolution of Gene Families: Origin and Duplication History of the Relaxin Family Hormones and Their Receptors
Source: PubMed Central journal article supplement (PMC3310001; doi:10.1371/journal.pone.0032923), 2012-03-21
Supplement: pone.0032923.s002.pdf [file pone.0032923.s002.pdf]

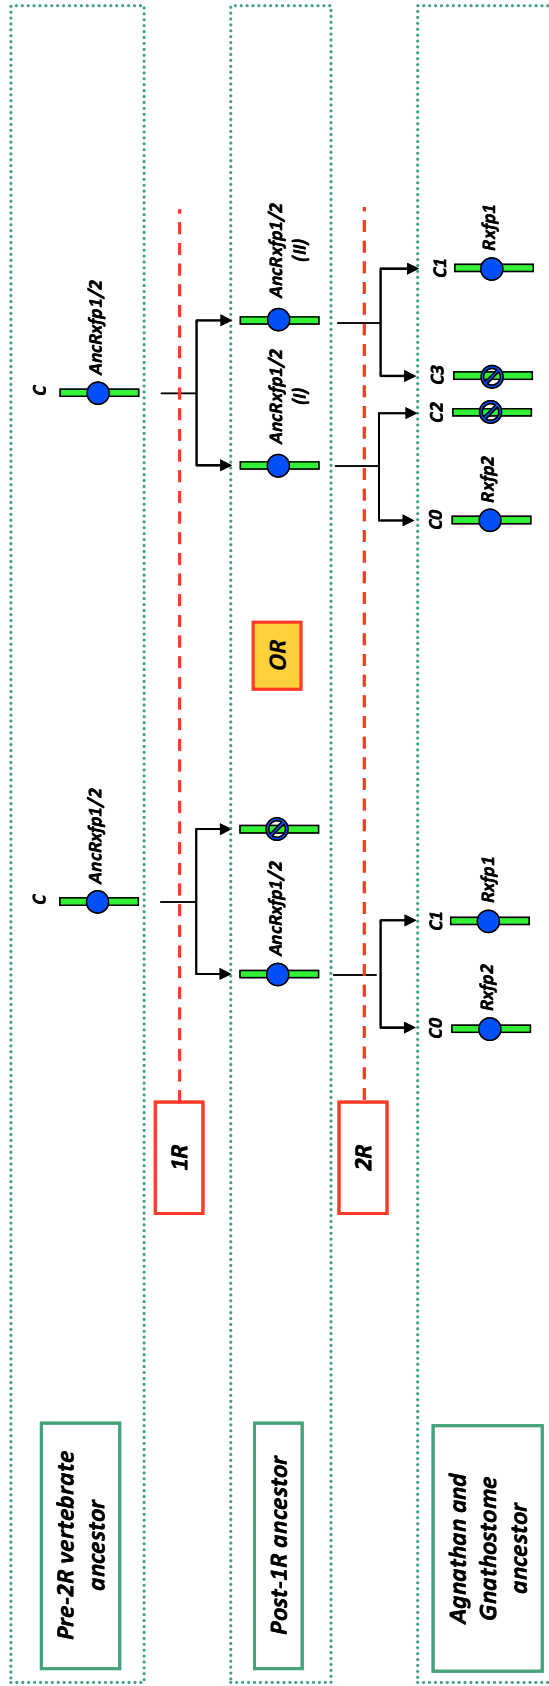

**Figure S2.** Two alternative scenarios for the 2R-driven duplication of the *AncRxfp1/2* gene. Note that based on the phylogenetic evidence (Figure 4b, main text), *RXFP2-like* is the paralog of *RXFP2*, in which case the two genes may have arisen as a result of 2R in *CLGs* “C0” and “C2”. The scenario on the right was hence adopted in the main text as more explanatory.
