# Supplementary material for: Using Paleogenomics to Study the Evolution of Gene Families: Origin and Duplication History of the Relaxin Family Hormones and Their Receptors
Source: PubMed Central journal article supplement (PMC3310001; doi:10.1371/journal.pone.0032923), 2012-03-21
Supplement: pone.0032923.s003.pdf [file pone.0032923.s003.pdf]

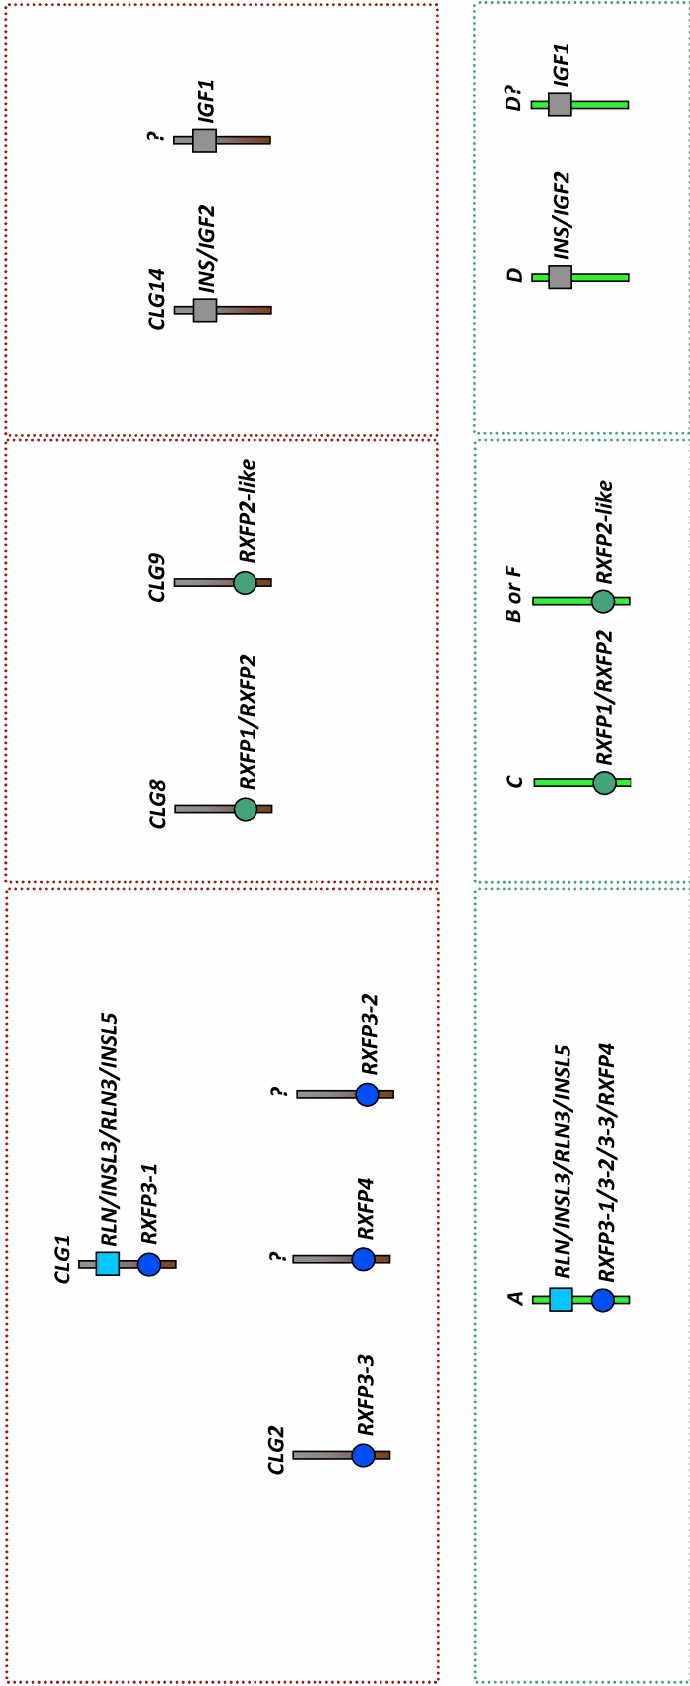

**Figure S3.** Comparison of the results obtained using two ancestral genome reconstructions **top:** Tracing of human *RLN/INSL* and *RXFP*-like genes in chordate linkage groups (*CLG*) using P-model; **bottom:** Tracing of human *RLN/INSL* and *RXFP* genes in pre-2R vertebrate ancestor chromosomes using N-model.
