# Supplementary material for: Using Paleogenomics to Study the Evolution of Gene Families: Origin and Duplication History of the Relaxin Family Hormones and Their Receptors
Source: PubMed Central journal article supplement (PMC3310001; doi:10.1371/journal.pone.0032923), 2012-03-21
Supplement: pone.0032923.s004.pdf [file pone.0032923.s004.pdf]

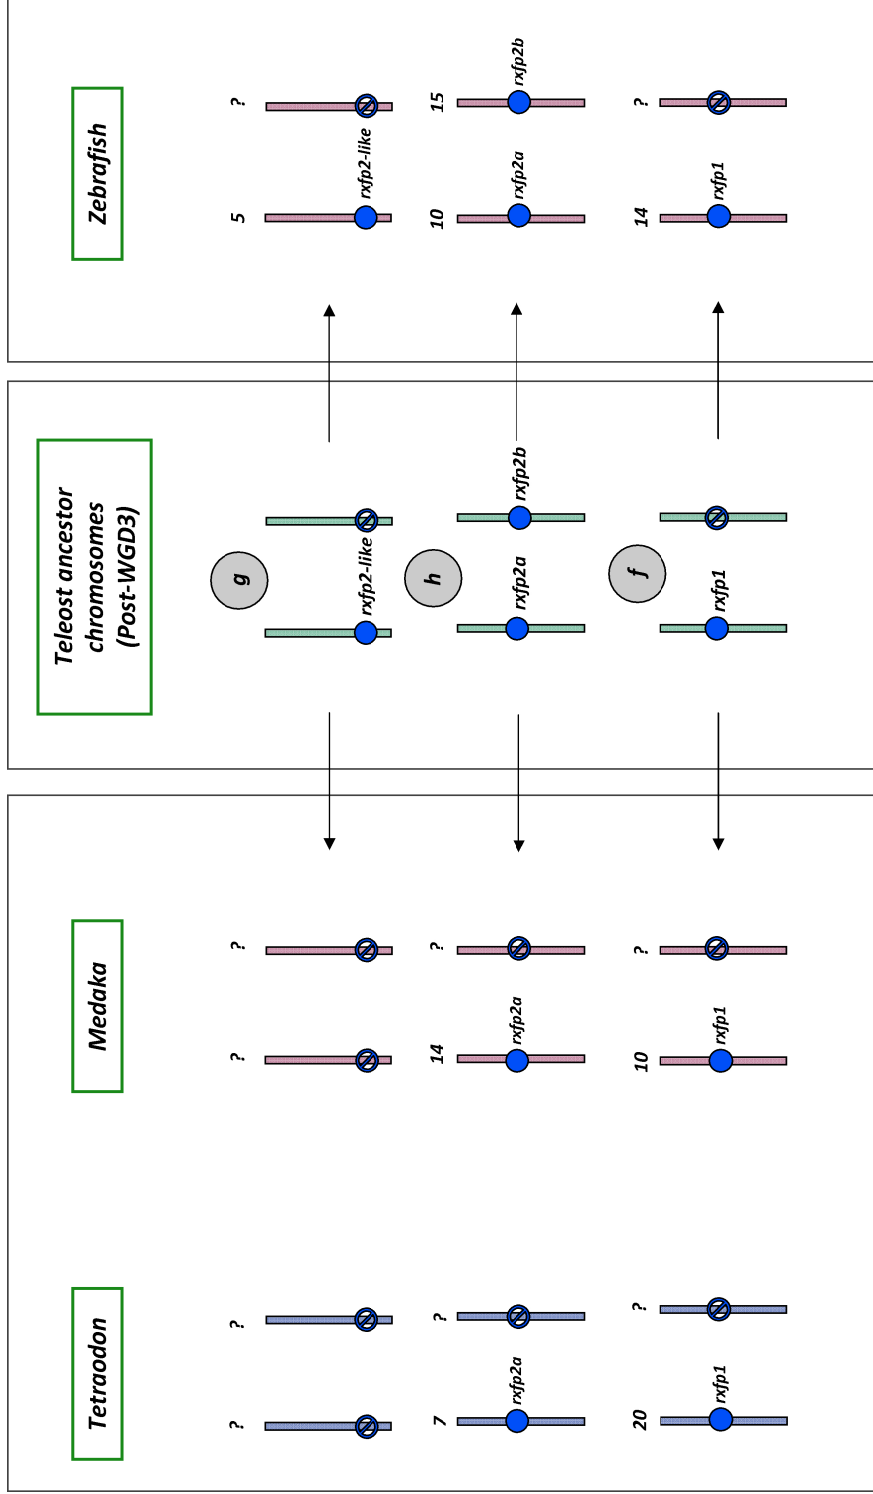

**Figure S4.** Chromosomal location of *rxfp1/2*-type genes in three species of teleosts and in the post-3R teleost ancestor
