# Supplementary material for: Using Paleogenomics to Study the Evolution of Gene Families: Origin and Duplication History of the Relaxin Family Hormones and Their Receptors
Source: PubMed Central journal article supplement (PMC3310001; doi:10.1371/journal.pone.0032923), 2012-03-21
Supplement: pone.0032923.s005.pdf [file pone.0032923.s005.pdf]

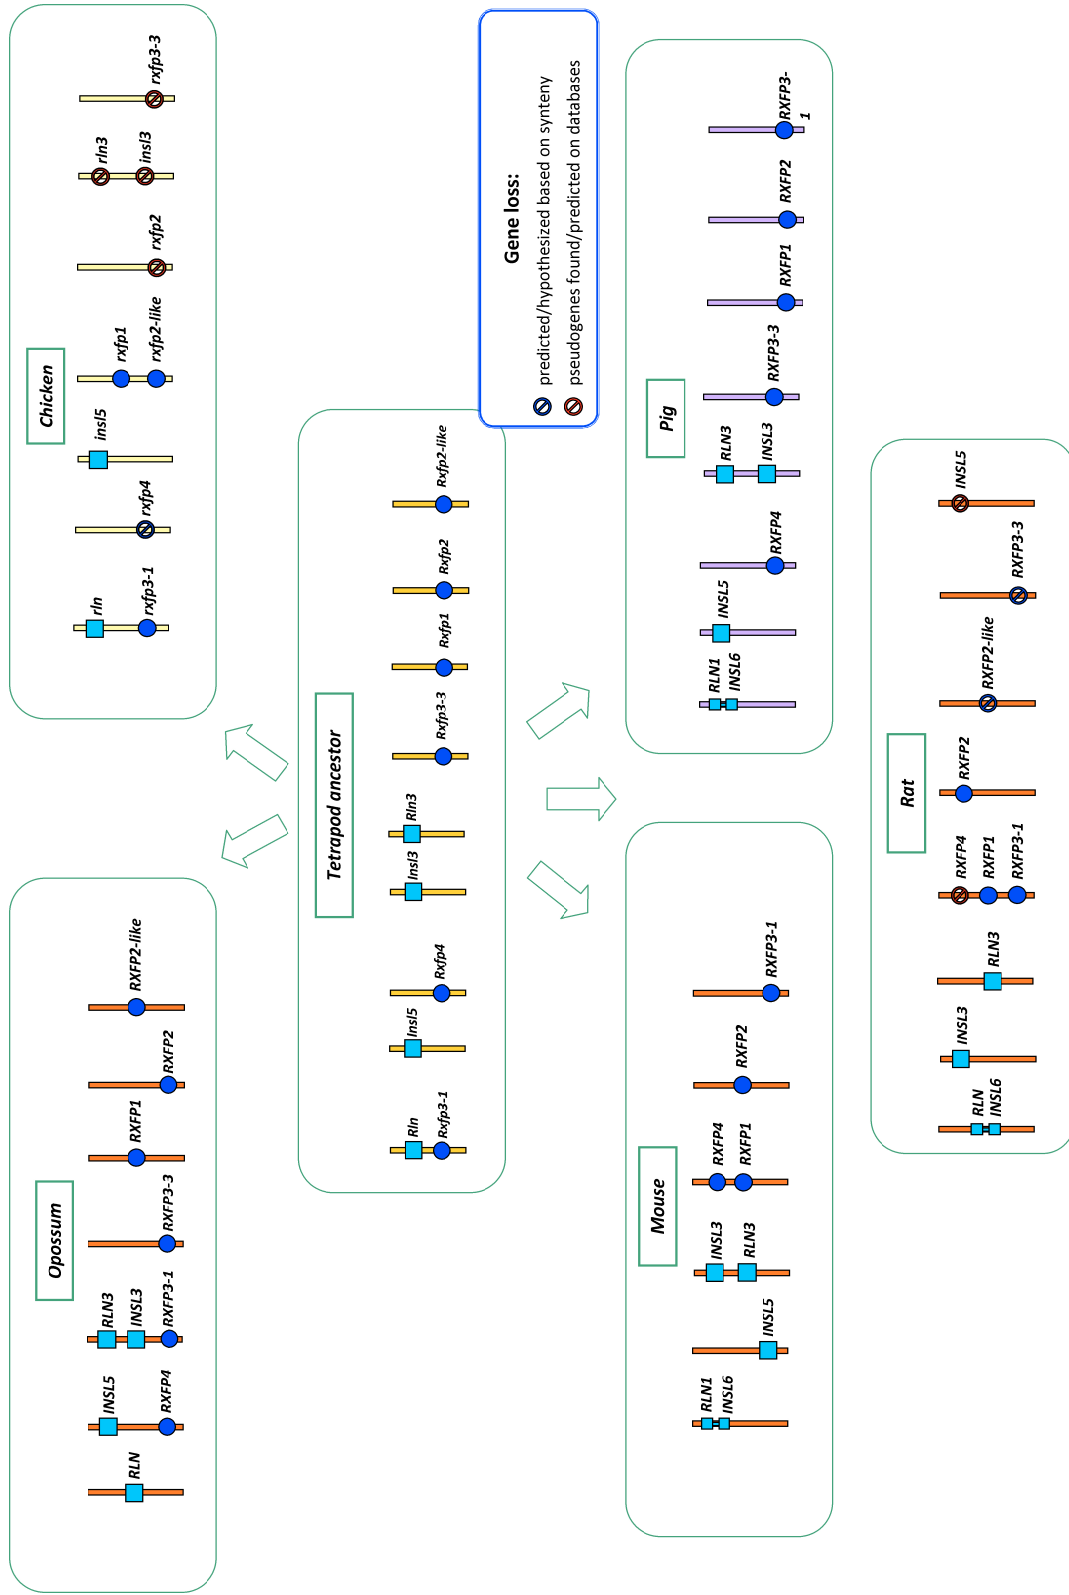

Figure S5.

**Figure S5.** Dynamic changes in the chromosomal linkage relationships of *RLN/INSL-RXFP* genes in tetrapods. Each bar represents a chromosome (IDs not shown for simplicity). Symbols and linkage numbering are as in *Figure 2* in main text.
