# Supplementary material for: Using Paleogenomics to Study the Evolution of Gene Families: Origin and Duplication History of the Relaxin Family Hormones and Their Receptors
Source: PubMed Central journal article supplement (PMC3310001; doi:10.1371/journal.pone.0032923), 2012-03-21
Supplement: pone.0032923.s008.pdf [file pone.0032923.s008.pdf]

**Table S1. Dataset used to reconstruct the duplication history of *RLN/INSL-RXFP* genes using model "N"**

Map positions of *RLN/INSL*, *RXFP* and *INS/IGF* genes in human (H), medaka (M) and chicken (C) are shown. The pre-3R teleost ancestor chromosomes that gave rise to the *rln/rxfp* medaka chromosomes are shown in column 3 (pre3R)  
 CVLb (H): Conserved Vertebrate Linkage blocks in human, determined using the known intrachromosomal position of human genes and the protochromosome map scheme from Nakatani et al. (2007)  
 GAC: Gnathostome Ancestor Chromosomes, reconstructed by Nakatani et al. (2007)  
 GAC (H): GACs potentially hosting the genes of interest based on the identified CVLb (H)  
 GAC (C): GACs hosting *RLN/INSL-RXFP* genes in chicken  
 GAC (R): GAC Resolved to contain *RLN/INSL-RXFP* genes in the gnathostome ancestor  
 GAC (M): GACs hosting the genes of interest based on the comparison between medaka and human  
 CVLb (R): CVLb resolved to contain *Rln/Insl-Rxfp* genes in the gnathostome ancestor

| Gene              | Map positions |           |                      |              |            | Ancestral linkage groups |                    |          |            |         |     |
|-------------------|---------------|-----------|----------------------|--------------|------------|--------------------------|--------------------|----------|------------|---------|-----|
|                   | H             | C         | M*                   | pre-3R       | CVLb (H)** | GAC (H)                  | GAC (M)            | GAC (C)  | CVLb (R)** | GAC (R) | VAC |
| <i>RLN (2)</i>    | 9: 5.30       | Z: 28.2   | 12: 14.80            | <i>i</i>     | 50         | A0                       | A0                 | A0       | 50         | A0      |     |
| <i>INSL3</i>      | 19: 17.93     | n/a       | 17: 60.74            | <i>m</i>     | 89-90      | A3-A1                    | A1                 | n/a      | 90         | A1      | A   |
| <i>INSL5</i>      | 1: 67.26      | 8: 29.36  | 4: 16.56; 17: 16.79  | <i>m</i>     | 2          | A2                       | A2                 | A2       | 2          | A2      |     |
| <i>RLN3</i>       | 19: 14.14     | n/a       | 1: 31.36; 8: 30.65   | <i>f-e-d</i> | 89         | A3                       | A3 (e)             | n/a      | 89         | A3      |     |
| <i>RXFP3-1</i>    | 5: 33.93      | Z: 9.7    | 12: 10.00            | <i>i</i>     | 27         | A0                       | A0                 | A0       | 27         | A0      | A   |
| <i>RXFP3-2</i>    | n/a           | n/a       | 17: 22.92; 4: 8.24   | <i>m; m</i>  | n/a        | n/a                      | A1-A2-B0-B5-F0-J1- | n/a      | 88-90-111  | A1      |     |
| <i>RXFP3-3</i>    | 15: 79.12†    | n/a       | 3: 10.20-10.95; 6: ? | <i>j; k</i>  | 76         | A4                       | A4 (j)             | n/a      | 76         | A4      |     |
| <i>RXFP4</i>      | 1: 155.91     | n/a       | 11: 6.39             | <i>b</i>     | 4-5-109    | A5-A2-Uh                 | A5                 | n/a      | 4          | A5      |     |
| <i>RXFP1</i>      | 4: 159.24     | 4: 23.0   | 10: ?                | <i>f-g</i>   | 25         | C1                       | C1                 | C1       | 25         | C1      | C   |
| <i>RXFP2</i>      | 13: 32.31     | 1: 179.1† | 14: 9.82             | <i>g-h</i>   | 71         | C0                       | C0                 | C0       | 71         | C0      |     |
| <i>RXFP2-like</i> | X: 67.94†     | 4: 0.57   | n/a                  | n/a          | 108-117    | B0-F4                    | n/a                | C1-B0-F4 | 108-117    | B0-F4   | B/F |

**Table S2. Dataset used to reconstruct the duplication history of *Ins/Igf* genes using model "N"**

| Tetrapods: Human and Chicken |            |          |          | Ancestral linkage groups |         |          |         |
|------------------------------|------------|----------|----------|--------------------------|---------|----------|---------|
| Gene                         | H          | C        | CVLb (H) | GAC (H)                  | GAC (C) | CVLb (R) | GAC (R) |
| <i>INS1</i>                  | 11: 2.153  | 5: 14.85 | 60       | D1                       | D1      | 60       | D1      |
| <i>IGF2</i>                  | 11: 2.150  | 5: 14.88 | 60       | D1                       | D1      | 60       | D1      |
| <i>IGF1</i>                  | 12: 102.79 | 1: 57.33 | 68       | D0                       | D0      | 68       | D0      |

**Fish: Medaka (M) and Tetraodon (T)**

|             | T        | pre-3R (T)   | M*        | pre-3R (M)  | pre-3R M-T*** | GAC (R)  |
|-------------|----------|--------------|-----------|-------------|---------------|----------|
| <i>ins1</i> | 1: 3.38  | <i>i/q/m</i> | 21: ?     | <i>c?</i>   | <i>g</i>      | B0/C2/F4 |
| <i>ins2</i> | 7: 10.6  | <i>g/h</i>   | 14: ?     | <i>g-h?</i> | <i>g</i>      | B0/C2/F4 |
| <i>igf1</i> | 19: 1.39 | <i>k</i>     | 23: 20.44 | <i>k</i>    | <i>k</i>      | D0       |
| <i>igf2</i> | 13: 6.6  | <i>j/k</i>   | n/a       | ?           | <i>k</i>      | D0       |

\* two positions are given for 3R duplicates located on two separate modern medaka chromosomes originating from one pre3R teleost ancestor chromosome

\*\* when multiple blocks match the same location/GAC, all possible block numbers are given separated by dashes (e.g. #-#-#)

† pseudogene

\*\* not all genome regions hosting *Ins/Igf* genes in medaka are assembled into chromosomes, therefore mapping of these genes is imprecise

\*\*\* based on shared ancestral teleost linkage groups, since all Tetraodon genes can be mapped to distinct chromosomes, results obtained for Tetraodon override Medaka

Genomic region around Tetraodon *Ins1* is syntenic to the region of Human Chromosome 5 under CVLb 28, which is equivalent to C2

**Table S3. Dataset used to reconstruct the origins of *Rln/Insl-Rxlp* genes in the chordate ancestor using model "P"**

Human genes were mapped to genome segments determined by Putnam et al., amphioxus candidate gene locations (scaffolds) were also assigned to CLGs based on the Oxford grid in Putnam et al.

Segment ID: Human Genome Segment boundaries corresponding to genomic locations as described in Putnam et al. [2]

CLG: Chordate Linkage Group, Putnam et al. identified 17 CLGs which correspond to the hypothetical chromosomes of the ancestor of amphioxus and *Olfactores* (unicates and vertebrates)

| Human genes       |            |            |     |
|-------------------|------------|------------|-----|
| Gene              | Location   | Segment ID | CLG |
| <i>RLN (2)</i>    | 9: 5.30    | 9.1        | 1   |
| <i>INSL3</i>      | 19: 17.93  | 19.3       | 1   |
| <i>INSL5</i>      | 1: 67.26   | 1.5        | 1   |
| <i>RLN3</i>       | 19: 14.14  | 19.2       | 1   |
| <i>RXFP3-1</i>    | 5: 33.93   | 5.1        | 1   |
| <i>RXFP3-3</i>    | 15: 79.12† | 15.2       | 2   |
| <i>RXFP4</i>      | 1: 155.91  | 1.13       | un* |
| <i>RXFP1</i>      | 4: 159.24  | 4.4        | 8   |
| <i>RXFP2</i>      | 13: 32.31  | 13.1       | 8   |
| <i>RXFP2-like</i> | X: 67.94†  | X.5        | 9   |
| <i>INS</i>        | 11: 2.153  | 11.1       | 14  |
| <i>IGF2</i>       | 11: 2.150  | 11.1       | 14  |
| <i>IGF1</i>       | 12: 102.79 | 12.9       | un* |

| Amphioxus <i>rln/insl/rxlp</i> and <i>ins/igf</i> candidates |          |               |
|--------------------------------------------------------------|----------|---------------|
| Gene ID                                                      | Scaffold | CLG           |
| <i>ilp4</i>                                                  | 7253642  | bf_v2_277 un* |
| <i>ilp5</i>                                                  | 7255900  | bf_v2_277 un* |
| <i>ilp6</i>                                                  | 7230317  | bf_v2_196 4   |
| <i>ilp2</i>                                                  | n/a      | bf_v2_190 14  |
| <i>ilp1</i>                                                  | 7235917  | bf_v2_190 14  |
| <i>ilp3</i>                                                  | 7251652  | bf_v2_243 14  |
| <i>rxfp1/2-like</i>                                          | 7252026  | bf_v2_249 7-8 |
|                                                              | 7229038  | bf_v2_150 8   |
|                                                              | 7221608  | bf_v2_150 8   |
|                                                              | 7207790  | bf_v2_21 un*  |
|                                                              | 7209355  | bf_v2_21 un*  |

\*segment not mapped to a CLG

**Table S4. Relaxin family peptide/receptor genes and their IDs in tetrapods (20 species)**

Chromosomal locations given in [chromosome number: megabases (Mb), rounded to the nearest 100.000 bp], Ensembl or GenBank IDs given.

gene name needs to be updated on ensembl  
not found or a pseudogene  
found but not annotated  
NCBI

|                                       | RLN-locus           |                     |                      |                     |                 |                     |                     |                     |                     |                      |                                 |                     |
|---------------------------------------|---------------------|---------------------|----------------------|---------------------|-----------------|---------------------|---------------------|---------------------|---------------------|----------------------|---------------------------------|---------------------|
|                                       | RLN3                | INSL3               | INSL5                | RLN <sup>a</sup>    | INSL4           | INSL6               | RXFP1               | RXFP2               | RXFP2-like          | RXFP3-1 <sup>n</sup> | RXFP3-3                         | RXFP4               |
| <b>Placental mammals</b>              |                     |                     |                      |                     |                 |                     |                     |                     |                     |                      |                                 |                     |
| 1 <i>H. sapiens (human)</i>           | ENSG00000171136     | ENSG00000248099     | ENSG00000172410      | ENSG00000107014     | ENSG00000120211 | ENSG00000120210     | ENSG00000171509     | ENSG00000133105     | †                   | ENSG00000182631      | GENSCAN00000038299 <sup>n</sup> | ENSG00000173080     |
| 2 <i>M. mulatta (rhesus)</i>          | ID: 717577          | HM102325            | ID: 699803           | ID: 693473          | ID: 693911      | ID: 693735          | ID: 701107          | ID: 721969          | †?                  | ID: 698115           | ID: 100426387 <sup>n</sup>      | ID: 718025          |
| 3 <i>B. taurus (cow)</i>              | ENSBTAG00000038437  | ENSBTAG000000025775 | ENSBTAG000000003850  | n/a                 | n/a             | ENSBTAG00000006651  | ENSBTAG00000010306  | ENSBTAG00000015132  | †?                  | ENSBTAG00000039929   | ENSBTAG00000026976              | ID: 450212          |
| 4 <i>S. scrofa (pig)</i>              | ENSSSCG000000013765 | ENSSSCG000000013887 | n/a?                 | ENSSSCG000000005216 | n/a             | ENSSSCG000000005214 | ENSSSCG00000008875  | ENSSSCG00000009336  | †?                  | ENSSSCG000000016820  | ENSSSCG00000001768              | ENSSSCG00000006503  |
| 5 <i>E. caballus (horse)</i>          | ENSECAG00000014897  | ENSECAG00000016450  | ENSECAG000000024174  | ENSECAG00000013020  | n/a             | ID: G7100146379     | ENSECAG00000013594  | ENSECAG00000014103  | †?                  | ENSECAG00000012797   | †?                              | ENSECAG00000007292  |
| 6 <i>C. lupus (dog)</i>               | ID: 610834          | ENSCAFG000000015187 | †                    | ENSCAFG000000002115 | n/a             | ENSCAFG000000002113 | ENSCAFG000000008672 | ENSCAFG000000006501 | †?                  | ID: 489237           | †?                              | †                   |
| 7 <i>S. araneus (shrew)</i>           | ENSSARG000000011917 | ***                 | †                    | ENSSART00000013075  | n/a             | ENSSARG000000004569 | ENSSARG00000013665  | ENSSARG00000009883  | †?                  | ENSSARG00000000381   | †?                              | n/a                 |
| 8 <i>C. porcellus (guinea pig)</i>    | ENSCPOG000000013564 | ENSCPOG000000019362 | ENSCPOG000000011735  | ENSCPOG00000001365  | n/a             | ENSCPOG00000002694  | ENSCPOG00000015517  | ENSCPOG00000009157  | †?                  | ENSCPOG00000009428   | †?                              | ENSCPOG00000003454  |
| 9 <i>M. musculus (mouse)</i>          | ENSMUSG000000045232 | ENSMUSG000000079019 | ENSMUSG000000066090  | ENSMUSG000000039097 | n/a             | ENSMUSG000000050957 | ENSMUSG000000034009 | ENSMUSG000000053368 | †?                  | ENSMUSG000000060735  | †?                              | ENSMUSG000000049741 |
| 10 <i>R. rattus (rat)</i>             | ENSRNOG000000005911 | ENSRNOG000000018757 | ENSRNOG000000037916† | ENSRNOG000000015920 | n/a             | ENSRNOG000000015868 | ENSRNOG000000024120 | ENSRNOG000000000897 | †?                  | ENSRNOG000000023126  | †?                              | †                   |
| 11 <i>O. cuniculus (rabbit)</i>       | ENSOCUG000000013451 | n/a?                | ID: 100141505        | ENSOCUG000000027403 | n/a             | ENSOCUG000000013682 | ENSOCUG00000001208  | ENSOCUG000000000751 | †?                  | ENSOCUG000000004946  | †?                              | ENSOCUG000000026819 |
| 12 <i>D. novemcinctus (armadillo)</i> | ENSDNOG000000012940 | no ID               | ENSDNOG000000015104  | ENSDNOG000000025594 | n/a             | ENSDNOG00000001668  | ENSDNOG00000001016  | ENSDNOG000000018859 | †?                  | ENSDNOG000000012031  | †?                              | ENSDNOG000000017055 |
| 13 <i>L. africana (elephant)</i>      | no id               | ENSLAFG000000025675 | ENSLAFG000000015826  | ENSLAFG000000017411 | n/a             | ENSLAFG000000007479 | ENSLAFG000000014435 | ENSLAFG000000012550 | †?                  | ENSLAFG000000017082  | †?                              | ENSLAFG000000011205 |
| <b>Marsupial mammals</b>              |                     |                     |                      |                     |                 |                     |                     |                     |                     |                      |                                 |                     |
| 14 <i>M. domestica (opossum)</i>      | gjl126323337        | gjl126323992        | no id                | ENSMODG000000015357 | n/a             | n/a                 | ENSMODG00000001973  | ENSMODG000000009382 | ENSMODG000000012676 | ENSMODG000000020402  | ENSMODG000000025367             | ENSMODG000000024291 |
| <b>Monotreme mammals</b>              |                     |                     |                      |                     |                 |                     |                     |                     |                     |                      |                                 |                     |
| 15 <i>O. anatinus (platypus)</i>      | gjl170014739        | ENSOANG000000021585 | n/a                  | gjl170014735        | n/a             | n/a                 | ENSOANG000000005387 | ENSOANG000000015476 |                     | ENSOANG00000001969   | †?                              | n/a                 |
| <b>Reptiles</b>                       |                     |                     |                      |                     |                 |                     |                     |                     |                     |                      |                                 |                     |
| 16 <i>A. carolinensis (lizard)</i>    | ENSACAG000000015658 | n/a                 | ENSACAG000000011316  | GENSCAN00000002500  | n/a             | n/a                 | ENSACAG000000016552 | n/a                 | ENSACAG00000007727  | ENSACAG00000008321   | n/a                             | n/a                 |
| <b>Birds</b>                          |                     |                     |                      |                     |                 |                     |                     |                     |                     |                      |                                 |                     |
| 17 <i>G. gallus (chicken)</i>         | n/a                 | n/a                 | ENSGALG000000020599  | ENSGALG000000015028 | n/a             | n/a                 | ENSGALG000000009429 | n/a                 | ENSGALG000000004543 | ENSGALG000000017411  | n/a                             | n/a                 |
| 18 <i>T. guttata (zebrafinch)</i>     | n/a                 | n/a                 | ENSTGUG000000010160  | ENSTGUG000000005041 | n/a             | n/a                 | ENSTGUG000000005573 | n/a                 | n/a                 | ENSTGUG000000001946  | n/a                             | n/a                 |
| <b>Amphibia</b>                       |                     |                     |                      |                     |                 |                     |                     |                     |                     |                      |                                 |                     |
| 19 <i>X. laevis (frog)</i>            | EU437449            | ENSXETG000000016437 | no id                | ENSXETG00000000587  | n/a             | n/a                 | ENSXETG000000019493 | ENSXETG000000019186 | ENSXETG000000011511 | ENSXETG000000011511  | n/a                             | ENSXETG00000001632  |
| 20 <i>R. esulenta (edible frog)</i> ◊ | FJ230963.2          | AJ298874.1          |                      |                     |                 |                     |                     |                     |                     |                      |                                 |                     |

<sup>a</sup> in humans RXFP3-1 and RXFP3-4 are equivalent to functional RXFP3 and RXFP4 respectively  
<sup>n</sup> identical one found at 1:226.8  
 †: putative pseudogene  
 \*\*\*: predicted by GenScan  
 ◊: annotated in NCBI  
 n/a: not identified and gene probably does not exist.  
 n/a? not identified because region not well annotated/sequenced, but sequence may exist  
 †: RLN is misnamed as RLN3 on Ensembl/NCBI, synteny confirms orthology to mammalian RLN  
 ‡ Rxfp2 gene is split between 2 locations: the LDL module is on chr12 and the LRR/7tm is on the scaffold  
 ^ genScan prediction incorrect but includes part of gene  
 \*\*\*\*there, but contig not fully sequenced and cannot get sequence

**Table S5. Mammalian lineage-specific duplicates in the RLN-locus**

| Human                               | ID                  |
|-------------------------------------|---------------------|
| RLN1                                | ENSG00000107018     |
| RLN2                                | ENSG00000107014     |
|                                     |                     |
| <b>Rabbit</b>                       |                     |
| Relaxin-like protein SQ10 Precursor | ENSOCUG000000027934 |
| Relaxin-like protein SQ10 Precursor | ENSOCUG000000027403 |
| unnamed                             | ENSOCUG000000026316 |
| unnamed                             | ENSOCUG000000008099 |
| unnamed                             | ENSOCUG000000008103 |
| unnamed                             | ENSOCUG000000025640 |
|                                     |                     |
| <b>Shrew</b>                        |                     |
| unnamed                             | ENSSARG000000013075 |
| unnamed                             | ENSSARG000000004245 |
| unnamed                             | ENSSARG000000010511 |
|                                     |                     |
| <b>Armadillo</b>                    |                     |
| rln-a                               | ENSDNOG000000025594 |
| unnamed                             | ENSDNOG000000025720 |
|                                     |                     |
| <b>Pig</b>                          |                     |
| Prorelaxin Precursor                | ENSSSCG000000005216 |
| Relaxin R-II1 A chain               | ENSSSCG000000005213 |

**Table S6. Relaxin family peptide/receptor genes and their chromosomal locations in tetrapods (20 species)**

**Chromosomal locations given in [chromosome number: megabases (Mb), rounded to the nearest 100.000 bp], all locations are from Ensembl, unless otherwise specified**

|                                       | RLN-locus        |                |             |                   |           |                 |                 |                |              |                      |            |                      |
|---------------------------------------|------------------|----------------|-------------|-------------------|-----------|-----------------|-----------------|----------------|--------------|----------------------|------------|----------------------|
|                                       | RLN3             | INSL3          | INSL5       | RLN               | INSL4     | INSL6           | RXFP1           | RXFP2          | RXFP2-like   | RXFP3-1 <sup>n</sup> | RXFP3-3    | RXFP3-4 <sup>n</sup> |
| <b>Placental mammals</b>              |                  |                |             |                   |           |                 |                 |                |              |                      |            |                      |
| 1 <i>H. sapiens</i> (human)           | 19: 14.14        | 19: 17.93      | 1: 67.26    | 9: 5.30           | 9: 5.23   | 9: 5.16         | 4: 159.24       | 13: 32.31      | X: 67.94†    | 5: 33.93             | 15: 79.12† | 1: 155.91            |
| 2 <i>M. mulatta</i> (rhesus)          | 19: 13.71        | 19: 17.4       | 1: 69.58    | 15: 71.83         | 15: 71.92 | 15: 72.00       | 5: 15.07        | 17: 11.10      | †?           | 6: 34.04             | 7: 57.95†  | 1: 13.45             |
| 3 <i>B. taurus</i> (cow)              | 7: 9.87          | 7: 5.26        | 3: 84.21    | n/a               | n/a       | 8: 41.52        | 17: 42.34       | 12: 29.01      | †?           | 20: 42.31            | 21: 30.35  | 3: 16.15             |
| 4 <i>S. scrofa</i> (pig)              | 2:57.0           | 2:62.1         | 6*          | 1:226.8**         | n/a       | 1:226.74        | 8:41.1          | 11:7.7         | †?           | 16:17.5              | 7: 54.0    | 4: 98.0              |
| 5 <i>E. caballus</i> (horse)          | 7:44.8           | 21:2.6         | 5:94.1      | 23:26.7           | n/a       | 23:26.6         | 2:75.8          | 17:11.0        | †?           | 21:30.7              | 1: 115.6†  | 5: 42.2              |
| 6 <i>C. lupus</i> (dog)               | 20:51.5***       | 20:48.1        | 5:46.7†     | 1: 96.6           | n/a       | 1: 96.5         | 15: 58.7        | 25: 11.3       | †?           | 4: 77.1†             | †?         | 7: 44.8†             |
| 7 <i>S. araneus</i> (shrew)           | sc79318: 0.0006: | sc_1461:1032   | †?          | scaffold_70875: 4 | n/a       | sc2354: 0.012   | sc5672: 0.004   | sc3003: 0.1    | †?           | sc4216: 0.008        | †?         | n/a?                 |
| 8 <i>C. porcellus</i> (guinea pig)    | sc42: 12.8       | sc72: 7.8      | sc2: 66.3   | sc21: 14.7        | n/a       | sc21: 14.7      | sc7: 31.8       | sc6: 33.2      | †?           | sc29:21.7            | †?         | 10:16.6              |
| 9 <i>M. musculus</i> (mouse)          | 8: 86.6          | 8: 74.2        | 4: 102.7    | 19: 29.4          | n/a       | 19:29.4         | 3: 79.5         | 5: 150.8       | †?           | 15: 10.96            | †?         | 3: 88.5              |
| 10 <i>R. rattus</i> (rat)             | 19: 25.8         | 16: 18.9       | 5: 123.9†   | 1: 233.0          | n/a       | 1: 233.0        | 2: 171.1        | 12: 5.3        | †?           | 2: 60.4              | †?         | 2: 180.8†            |
| 11 <i>O. cuniculus</i> (rabbit)       | sc1049: 0.028    | n/a?           | 13:99.4     | chr1              | n/a       | chr1            | sc58: 1.2       | sc59: 2.4      | †?           | 11: 55.7             | †?         | 13:36.9              |
| 12 <i>D. novemcinctus</i> (armadillo) | sc236409: 0.0001 | sc31772: 0.017 | sc2247: 0.3 | sc1575: 0.061     | n/a       | sc119039: 0.003 | sc1259: 0.003   | sc3001: 0.024  | †?           | sc6302:0.04†         | †?         | sc4957:0.006         |
| 13 <i>L. africana</i> (elephant)      | sc26: 29.1       | sc26: 24.2     | sc17: 27.1  | sc6: 93.9         | n/a       | sc88: 0.58      | sc61: 9.6       | sc11: 5.3      | †?           | sc7: 37.9            | †?         | sc33: 4.4            |
| <b>Marsupial mammals</b>              |                  |                |             |                   |           |                 |                 |                |              |                      |            |                      |
| 14 <i>M. domestica</i> (opossum)      | 3: 446.3         | 3: 476.4       | 2: 24.49    | 6: 166.9          | n/a       | n/a             | 5: 116.5        | 4: 303.2       | Un: 50.4, X? | 3: 242.6             | 1: 9.8     | 2: 190.8             |
| <b>Monotreme mammals</b>              |                  |                |             |                   |           |                 |                 |                |              |                      |            |                      |
| 15 <i>O. anatinus</i> (platypus)      | ultc605:0.02     | c19353: 0.007  | n/a?        | X5: 11.5          | n/a       | n/a             | 12: 13.5/c5907: | ultc336: 0.46¥ | ?            | c1755: 0.011         | †?         | n/a?                 |
| <b>Reptiles</b>                       |                  |                |             |                   |           |                 |                 |                |              |                      |            |                      |
| 16 <i>A. carolinensis</i> (lizard)    | sc132: 2.7       | n/a?           | sc619: 0.48 | sc13: 3.2         | n/a       | n/a             | sc284: 0.6      | n/a            | sc1398: 0.05 | sc3: 1.7             | n/a        | n/a?                 |
| <b>Birds</b>                          |                  |                |             |                   |           |                 |                 |                |              |                      |            |                      |
| 17 <i>G. gallus</i> (chicken)         | n/a?             | n/a?           | 8: 29.36    | Z: 28.2           | n/a       | n/a             | 4: 23.0         | 1: 179,14 †    | 4: 0.57      | Z: 9.7               | n/a        | n/a                  |
| 18 <i>T. guttata</i> (zebrafinch)     | n/a?             | n/a?           | 8: 26.7     | Z: 63.9           | n/a       | n/a             | 4: 29.7         | n/a            | n/a?         | Z: 41.0              | n/a        | n/a                  |
| <b>Amphibia</b>                       |                  |                |             |                   |           |                 |                 |                |              |                      |            |                      |
| 19 <i>X. laevis</i> (frog)            | sc649: 0.087     | sc969: 0.20    | sc431: 0.98 | sc86: 2.1         | n/a       | n/a             | sc110: 0.6      | sc80: 1.6      | sc422: 0.30  | sc803: 0.128         | n/a        | sc9769: 0.009        |
| 20 <i>R. esulenta</i> (edible frog)◊  | FJ230963.2       | AJ298874.1     |             |                   |           |                 |                 |                |              |                      |            |                      |

<sup>n</sup> in humans RXFP3-1 and RXFP3-4 are equivalent to functional RXFP3 and RXFP4 respectively

\* not annotated along with syntenic genes, but probably exists

\*\*identical one found at 1:226.8

†: putative pseudogene: rat insl5 is a processed pseudogene

\*\*\*predicted by Genscan

◊ annotated on NCBI

n/a?: not identified, but likely exists

: RLN is misnamed as RLN3 on Ensembl/NCBI, synteny confirms orthology to mammalian RLN

¥ Rxfp2 gene is split between 2 locations: the LDL module is on chr12 and the LRR/7tm is on the scaffold

**Table S7. Relaxin family peptide/receptor genes and their IDs in teleost fish (5 species)**

Chromosomal locations given in [chromosome number: megabases (Mb), rounded to the nearest 100.000 bp], all locations are from Ensembl, unless otherwise specified

***rln/insl genes***

|                                    | <i>rln3a</i>        | <i>rln3b</i>        | <i>insl3</i>        | <i>insl5a</i>       | <i>insl5b</i>       | <i>rln<sup>a</sup></i> |
|------------------------------------|---------------------|---------------------|---------------------|---------------------|---------------------|------------------------|
| <b>Species</b>                     |                     |                     |                     |                     |                     |                        |
| <i>D. rerio</i> (zebrafish)        | ENSNDARG00000070780 | ENSNDARG00000039854 | ENSNDARG00000035862 | ENSNDARG00000070966 | ENSNDARG00000069294 | 100329416              |
| <i>O. latipes</i> (medaka)         | ENSORLG00000011777  | ENSORLG00000010278  | GENSCAN00000085130  | GENSCAN00000098652  | NO ID               | ENSORLG00000009974     |
| <i>G. aculeatus</i> (stickleback)  | ENSGACG00000018985  | ENSGACG00000012435  | NO ID               | NO ID               | ENSGACG00000016154  | ENSGACG00000017364     |
| <i>T. nigroviridis</i> (tetraodon) | GSTENG00026277001   | †?                  | GSTENG00020897001   | EU437461            | EU437463            | EU437459               |
| <i>T. rubripes</i> (takifugu)      | ENSTRUG00000010031  | ENSTRUG00000012677  | SINFRUG00000162280  | GENSCAN00000013221  | GENSCAN00000015952  | ENSTRUG00000005640     |

***rxfp1/2 and rxfp3/4 genes***

|                                    | <i>rxfp1</i>        | <i>rxfp2a</i>       | <i>rxfp2b</i>       | <i>rxfp2-like</i>   | <i>rxfp3-1</i>      | <i>rxfp3-2a</i>     |
|------------------------------------|---------------------|---------------------|---------------------|---------------------|---------------------|---------------------|
| <b>Species</b>                     |                     |                     |                     |                     |                     |                     |
| <i>D. rerio</i> (zebrafish)        | ENSNDARG00000090071 | ENSNDARG00000032820 | ENSNDARG00000019660 | ENSNDARG00000068731 | ENSNDARG00000057410 | ENSNDARG00000022739 |
| <i>O. latipes</i> (medaka)         |                     |                     | n/a                 | n/a                 | ENSORLG00000006539  | ENSORLG00000014985  |
| <i>G. aculeatus</i> (stickleback)  | ENSGACG00000016581  | ENSGACG00000020550  | n/a                 | n/a                 | ENSGACG00000016296  | ENSGACG00000015315  |
| <i>T. nigroviridis</i> (tetraodon) | ENSTNIG00000013038  | ENSTNIG00000009913  | n/a                 | n/a                 | ENSTNIT00000003086  | ENSTNIG00000015329  |
| <i>T. rubripes</i> (takifugu)      | ENSTRUG00000016132  | ENSTRUT00000005652  | n/a                 | n/a                 | ENSTRUG00000014489  | ENSTRUG00000007126  |

|  | <i>rxfp3-2b</i> | <i>rxfp3-3a2</i> | <i>rxfp3-3a1</i> | <i>rxfp3-3b</i> | <i>rxfp3-3a3</i> | <i>rxfp4</i> |
|--|-----------------|------------------|------------------|-----------------|------------------|--------------|
|--|-----------------|------------------|------------------|-----------------|------------------|--------------|

**Species**

|                                    |                     |                     |                     |                     |                     |                    |
|------------------------------------|---------------------|---------------------|---------------------|---------------------|---------------------|--------------------|
| <i>D. rerio</i> (zebrafish)        | ENSNDARG00000061846 | ENSNDARG00000062111 | ENSNDARG00000069028 | ENSNDARG00000059348 | ENSNDARG00000069246 |                    |
| <i>O. latipes</i> (medaka)         | no id               | ENSORLG00000001754  | ENSORLG00000002054  | ENSORLG00000019204  | n/a                 | ENSORLG00000003213 |
| <i>G. aculeatus</i> (stickleback)  | ENSGACG00000012856  | ENSGACG00000016895  | ENSGACG00000016952  | ENSGACG00000008049  | n/a                 | ENSGACG00000003931 |
| <i>T. nigroviridis</i> (tetraodon) | ENSTNIG00000010632  | ENSTNIG00000009550  | ENSTNIG00000009561  |                     |                     | ENSTNIG00000009161 |
| <i>T. rubripes</i> (takifugu)      | ENSTRUG00000017932  | ENSTRUG00000016840  | ENSTRUG00000016739  | ENSTRUG00000014434  | n/a                 | gjl74096006        |

**Table S8. Relaxin family peptide/receptor genes and their chromosomal locations in teleost fish**

Chromosomal locations given in [chromosome number: megabases (Mb), rounded to the nearest 100.000 bp], all locations are from Ensembl, unless otherwise specified

|                                    | <i>rln3a</i> | <i>rln3b</i> | <i>insl3</i> | <i>insl5a</i> | <i>insl5b</i> | <i>rln<sup>a</sup></i> |
|------------------------------------|--------------|--------------|--------------|---------------|---------------|------------------------|
| <b>Species</b>                     |              |              |              |               |               |                        |
| <i>D. rerio</i> (zebrafish)        | 3: 19.03     | 1: 50.17     | 2: 20.05     | 6: 30.40      | 2: 9.92       | 21: 0.20               |
| <i>O. latipes</i> (medaka)         | 1: 31.36     | 8: 30.65     | 17: 60.74    | 4: 16.56      | 17: 16.79     | 12: 14.80              |
| <i>G. aculeatus</i> (stickleback)  | 9: 15.05     | 11: 11.63    | 3: 8.50      | 8: 8.10       | 3: 9.58       | 14: 7.44               |
| <i>T. nigroviridis</i> (tetraodon) | 18: 2.04     | n/a          | 15: 3.88     | 1: 15.66      | 15: 3.44      | 4: 1.08                |
| <i>T. rubripes</i> (takifugu)      | sc189: 0.355 | sc141: 0.678 | sc212: 0.364 | sc55: 0.131   | sc166: 0.545  | sc243: 0.093           |

|  | <i>rxfp1</i> | <i>rxfp2a</i> | <i>rxfp2b</i> | <i>rxfp2-like</i> | <i>rxfp3-1</i> | <i>rxfp3-2a</i> |
|--|--------------|---------------|---------------|-------------------|----------------|-----------------|
|--|--------------|---------------|---------------|-------------------|----------------|-----------------|

**Species**

|                                    |            |               |           |          |            |                               |
|------------------------------------|------------|---------------|-----------|----------|------------|-------------------------------|
| <i>D. rerio</i> (zebrafish)        | 14: 51.06  | 10: 34.81     | 15: 30.98 | 5: 37.50 | 21: 18.31  | 2: 53.78 (ENSEM), 4: ? (NCBI) |
| <i>O. latipes</i> (medaka)         | 10: ?*     | 14: 9.82      | n/a       | n/a      | 12: 10.00  | 17: 22.92                     |
| <i>G. aculeatus</i> (stickleback)  | 4: 2.39    | 7: 19.90      | n/a       | n/a      | 14: 3.51   | 3: 7.51                       |
| <i>T. nigroviridis</i> (tetraodon) | 20: 2.24   | 7: 3.13       | n/a       | n/a      | 4: ††      | 15: 4.70                      |
| <i>T. rubripes</i> (takifugu)      | sc5: 0.003 | sc2436: 0.007 | n/a       | n/a      | sc44: 1.50 | sc200: 0.130                  |

|  | <i>rxfp3-2b</i> | <i>rxfp3-3a2</i> | <i>rxfp3-3a1</i> | <i>rxfp3-3b</i> | <i>rxfp3-3a3</i> | <i>rxfp4</i> |
|--|-----------------|------------------|------------------|-----------------|------------------|--------------|
|--|-----------------|------------------|------------------|-----------------|------------------|--------------|

**Species**

|                                    |             |           |           |               |           |               |
|------------------------------------|-------------|-----------|-----------|---------------|-----------|---------------|
| <i>D. rerio</i> (zebrafish)        | 22: 20.42   | 7: 58.58  | 7: 35.21  | 25: 1.41      | 18: 19.81 | n/a           |
| <i>O. latipes</i> (medaka)         | 4: 8.24     | 3: 10.95  | 3: 10.20  | 6: ?          | n/a       | 11: 6.39      |
| <i>G. aculeatus</i> (stickleback)  | 8: 16.28    | 2: 18.72  | 2: 19.11  | 19: 9.18      | n/a       | 10: 5.35      |
| <i>T. nigroviridis</i> (tetraodon) | 1: 13.78    | 5: 10.38  | 5: 10.62  | 13: 12.75     | n/a       | 21: 1.73      |
| <i>T. rubripes</i> (takifugu)      | sc25: 0.761 | sc1: 3.39 | sc1: 3.12 | sc4528: 0.004 | n/a       | sc138: 0.096◊ |

<sup>a</sup> rln is the orthologue of the human RLN2 (H2) gene

†: putative pseudogene

◊ annotated on NCBI as GPR100

\* ultracontig115: 1,259,584-1,305,610 (Ensembl) corresponds to chr10 on UTGB

**Table S9. Relaxin family peptide/receptor genes and their chromosomal locations in Ascidians (1 species- *C.intestinalis*)**

|                      | Species                | Name on phylogeny | Gene ID (Ensembl)  | Gene ID (NCBI) | Map location |
|----------------------|------------------------|-------------------|--------------------|----------------|--------------|
| <i>rxfp1/2-like*</i> | <i>C. intestinalis</i> | <i>rxfp1/2-L</i>  | n/a                | 100178659      | 3p: 3.28     |
| <i>rxfp3-4-like</i>  |                        | <i>rxfp3-L1</i>   | ENSCING00000012511 | ?              | 1q: 4.67     |
|                      | <i>C. intestinalis</i> | <i>rxfp3-L2</i>   | ENSCING00000014875 | 100185531      | 6q: 0.975    |

\* *rxfp1/2* gene obtained from Kamesh et al. and verified using the Ensembl *C. intestinalis* browser

**Table S10. *Rxfp1/2*-type genes and their chromosomal locations in lancelet (1 species)**

*Branchiostoma floridae* (genome sequenced and assembled into contigs)

|                        | Name on phyloger  | Gene ID (NCBI) | Protein ID (JGI) | Scaffold: version2 |  |
|------------------------|-------------------|----------------|------------------|--------------------|--|
| <i>rxfp1/2-type***</i> | <i>rxfp1/2-L1</i> | 7252026        | 63628            | bf_v2_249          |  |
|                        | <i>rxfp1/2-L2</i> | 7229038        | 134702           | bf_v2_150          |  |
|                        | <i>rxfp1/2-L3</i> | 7221608        | 63627            | bf_v2_150          |  |
|                        | <i>rxfp1/2-L4</i> | 7207790        | 204729           | bf_v2_21           |  |
|                        | <i>rxfp1/2-L5</i> | 7209355        | 98820            | bf_v2_21           |  |

  

|             | Gene ID (NCBI) | Protein ID (JGI) | Scaffold: version2 | Scaffold: version1* | Exact map location |                             |
|-------------|----------------|------------------|--------------------|---------------------|--------------------|-----------------------------|
| <i>ilps</i> | n/a            | n/a**            | bf_V2_190          | 59                  |                    |                             |
|             | n/a            | 7235917          | 121099             | bf_V2_190           | 59                 | scaffold_59:2166507-2182058 |
|             | n/a            | 7251652          | 97394              | bf_v2_243           | 302 (243)          | scaffold_302:862279-904829  |
|             | n/a            | 7253642          | 100967             | bf_v2_277           | 41 (372)           |                             |
|             | n/a            | 7255900          | 100968             | bf_v2_277           | 41 (372)           | scaffold_372:110792-121518  |
|             | n/a            | 7230317          | 74371              | bf_v2_196           | 73 (50)            | scaffold_50:2135877-2137051 |

\*\*\**rxfp1/2* sequences were obtained from NCBI referring to Nordström *et al.*, with the exception of BRAFLDRAFT\_231009, which could not be found in the current database

bf\_v2\_21 shares 2 genes with *rxfp2* region

**Table S11. *Rxfp1/2*-type genes in Echinoderms (1 species)**Sea Urchin (*Strongylocentrotus purpuratus*) *rxfp1/2* IDs are from SpBase (<http://www.spbase.org/SpBase/>)

| Species                                           | Name on phylogeny  | Gene ID    |
|---------------------------------------------------|--------------------|------------|
| <i>rxfp1/2s</i> <i>S. purpuratus</i> (sea urchin) | <i>rxfp1/2-L1</i>  | SPU_000792 |
|                                                   | <i>rxfp1/2-L2</i>  | SPU_000840 |
|                                                   | <i>rxfp1/2-L3</i>  | SPU_001502 |
|                                                   | <i>rxfp1/2-L4</i>  | SPU_003492 |
|                                                   | <i>rxfp1/2-L5</i>  | SPU_003527 |
|                                                   | <i>rxfp1/2-L6</i>  | SPU_004308 |
|                                                   | <i>rxfp1/2-L7</i>  | SPU_005497 |
|                                                   | <i>rxfp1/2-L8</i>  | SPU_009179 |
|                                                   | <i>rxfp1/2-L9</i>  | SPU_011953 |
|                                                   | <i>rxfp1/2-L10</i> | SPU_013866 |
|                                                   | <i>rxfp1/2-L11</i> | SPU_015134 |
|                                                   | <i>rxfp1/2-L12</i> | SPU_016206 |
|                                                   | <i>rxfp1/2-L13</i> | SPU_019187 |
|                                                   | <i>rxfp1/2-L14</i> | SPU_019188 |
|                                                   | <i>rxfp1/2-L15</i> | SPU_019240 |
|                                                   | <i>rxfp1/2-L16</i> | SPU_019676 |
|                                                   | <i>rxfp1/2-L17</i> | SPU_020381 |
|                                                   | <i>rxfp1/2-L18</i> | SPU_020408 |
|                                                   | <i>rxfp1/2-L19</i> | SPU_022337 |
|                                                   | <i>rxfp1/2-L20</i> | SPU_023168 |
|                                                   | <i>rxfp1/2-L21</i> | SPU_023629 |
|                                                   | <i>rxfp1/2-L22</i> | SPU_024157 |
|                                                   | <i>rxfp1/2-L23</i> | SPU_025906 |
|                                                   | <i>rxfp1/2-L24</i> | SPU_026409 |
|                                                   | <i>rxfp1/2-L25</i> | SPU_027093 |
|                                                   | <i>rxfp1/2-L26</i> | SPU_027094 |
|                                                   | <i>rxfp1/2-L27</i> | SPU_027097 |
|                                                   | <i>rxfp1/2-L28</i> | SPU_028324 |

**Table S12. Vertebrate INS/IGF genes (4 species)**

|                     |                                           |                    |                    |                                                         |
|---------------------|-------------------------------------------|--------------------|--------------------|---------------------------------------------------------|
|                     | <b>Medaka (<i>O. latipes</i>)</b>         |                    |                    |                                                         |
| <b>Name</b>         | ins1                                      | ins2               | igf1               | igf2                                                    |
| <b>Map location</b> | scaffold498: 0.025                        | scaffold223: 0.409 | Chr23: 20.44       | scaffold1060: 0.013                                     |
| <b>Ensembl ID</b>   | ENSORLG00000018432                        | ENSORLG00000018994 | ENSORLG00000016443 | ENSORLG00000018930                                      |
| <b>Chromosomes*</b> | 21                                        | 14                 | 23                 | 14?                                                     |
|                     |                                           |                    |                    | <i>missing b-chain, not included in final phylogeny</i> |
|                     | <b>Tetraodon (<i>T. nigroviridis</i>)</b> |                    |                    |                                                         |
| <b>Name</b>         | ins1                                      | ins2               | igf1               | igf2                                                    |
| <b>Map location</b> | 1: 3.4                                    | 7: 10.6            | 19: 1.4            | 13: 6.6                                                 |
| <b>Ensembl ID</b>   | ENSTNIG00000004978                        | ENSTNIG00000004978 | ENSTNIG00000012663 | ENSTNIG00000010464                                      |
|                     |                                           |                    |                    |                                                         |
|                     | <b>Human (<i>H. sapiens</i>)</b>          |                    |                    |                                                         |
| <b>Name</b>         | INS                                       | IGF1               | IGF2               |                                                         |
| <b>Map location</b> | Chr11: 2.15                               | Chr12: 102.79      | Chr11: 2.15        |                                                         |
| <b>Ensembl ID</b>   | ENSG00000129965                           | ENSG00000017427    | ENSG00000167244    |                                                         |
|                     |                                           |                    |                    |                                                         |
|                     | <b>Chicken (<i>G. gallus</i>)</b>         |                    |                    |                                                         |
| <b>Name</b>         | ins                                       | igf1               | igf2               |                                                         |
| <b>Map location</b> | Chr5: 14.85                               | Chr1: 57.33        | Chr5: 14.88        |                                                         |
| <b>Ensembl ID</b>   | ENSGALG00000006552                        | ENSGALG00000012755 | ENSGALG00000006555 |                                                         |

\* putative chromosomes from UTGB database: the medaka genome is not fully assembled
